# Supplementary material
Source: Springer Nature journal article supplement (https://www.springermedizin.de/resource/supplementary/12865_2011_434_MOESM7_ESM.pdf/9427984)

**Relative fold change of SOCS-3  
mRNA expression ( $\Delta\Delta Ct$ )**

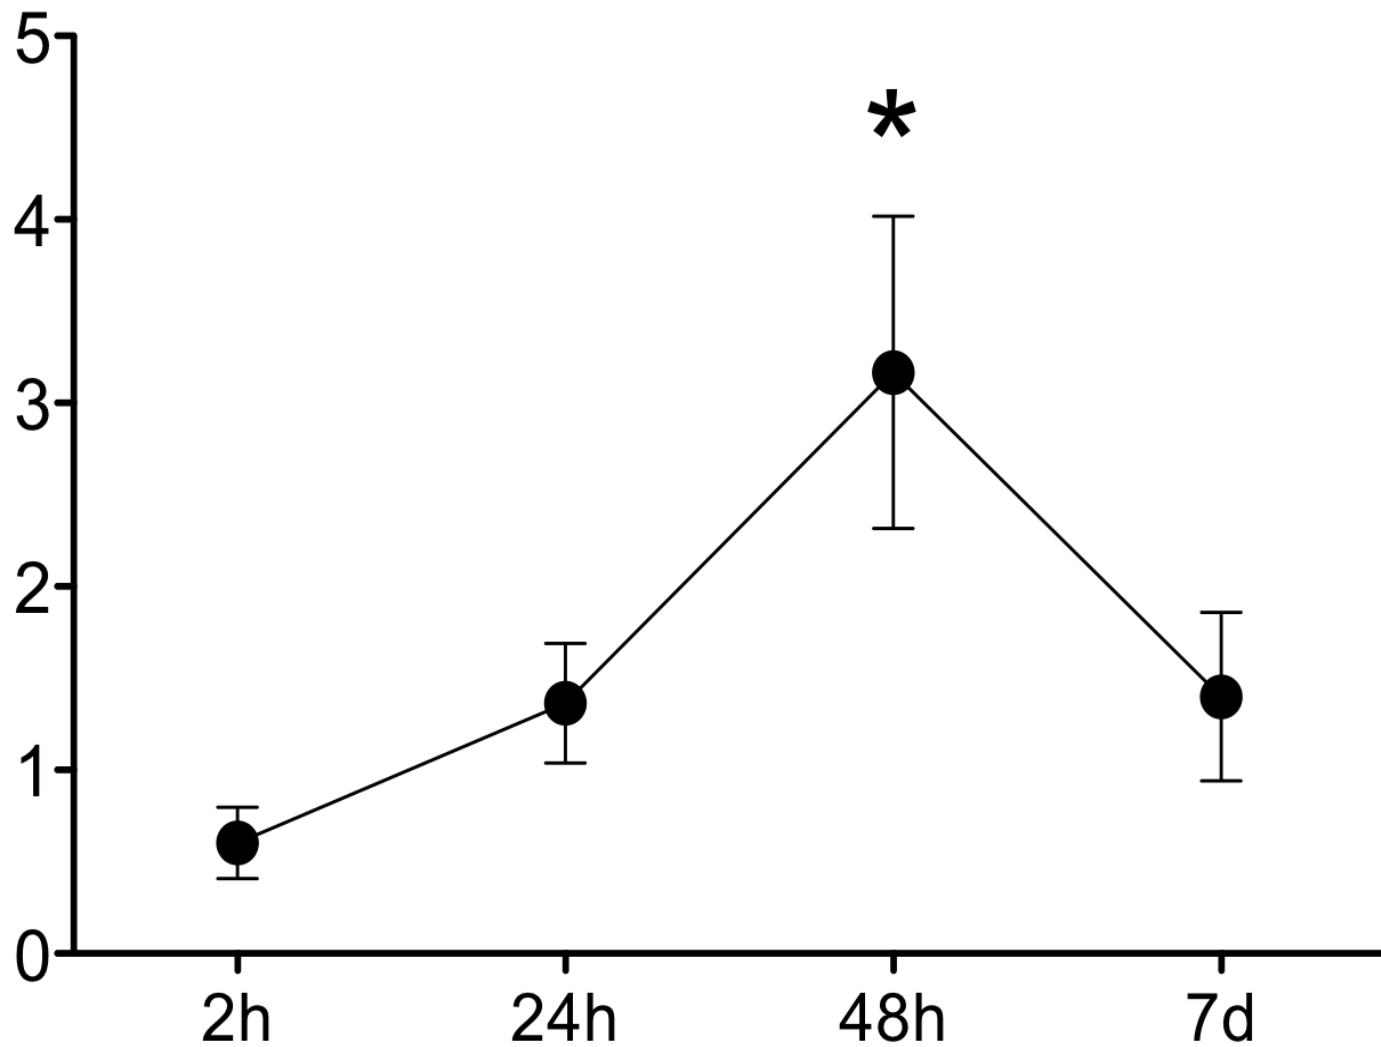

**Time**

Supplement: MOESM7 [file 9427984]
